# Supplementary material for: Poly(anthraquinonyl imide) as a high capacity organic cathode material for Na-ion batteries
Source: Royal Society of Chemistry journal article supplement (doi:10.1039/c6ta03956a), 2016-01-01
Supplement: c6ta03956a1.pdf [file c6ta03956a1.pdf]

## Electronic Supplementary Information

### **Poly(anthraquinonyl imide) as a high capacity organic cathode material for Na-ion batteries**

Fei Xu,<sup>\*a</sup> Hongtao Wang,<sup>a</sup> Jianghui Lin,<sup>a</sup> Xiao Luo,<sup>a</sup> Shun-an Cao,<sup>a</sup> Hanxi Yang<sup>\*b</sup>

<sup>a</sup> *School of Power and Mechanical Engineering, Wuhan University, Wuhan 430072, China*

<sup>b</sup> *College of Chemistry and Molecular Science, Wuhan University, Wuhan 430072, China*

\* E-mail:

Fei Xu (xufei2058@whu.edu.cn)

Hanxi Yang (hxyang@whu.edu.cn)

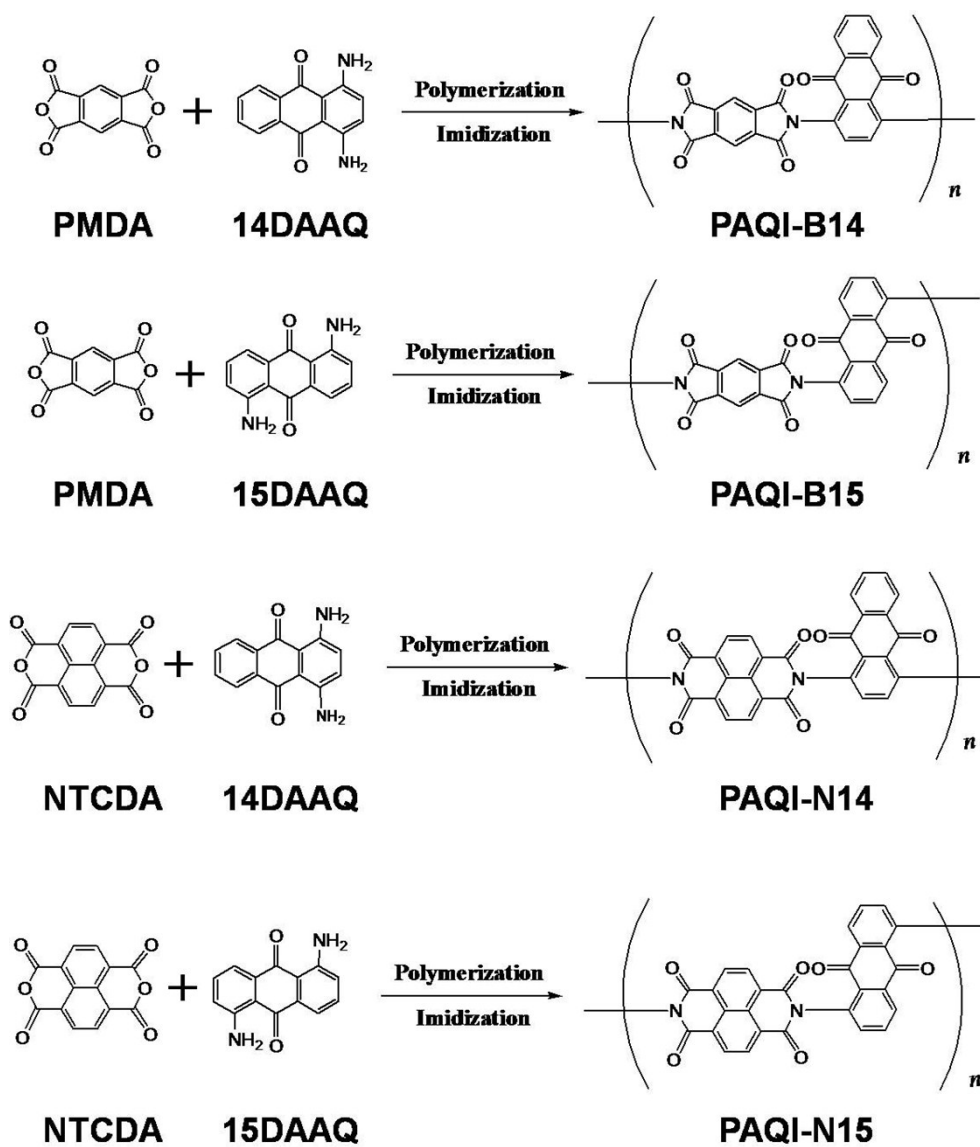

Fig. S1 Synthesis routes of PAQIs.

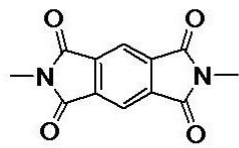

**PMDI**

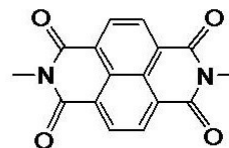

**NTCDI**

**Fig. S2** Structures of PMDI and NTCDI groups.

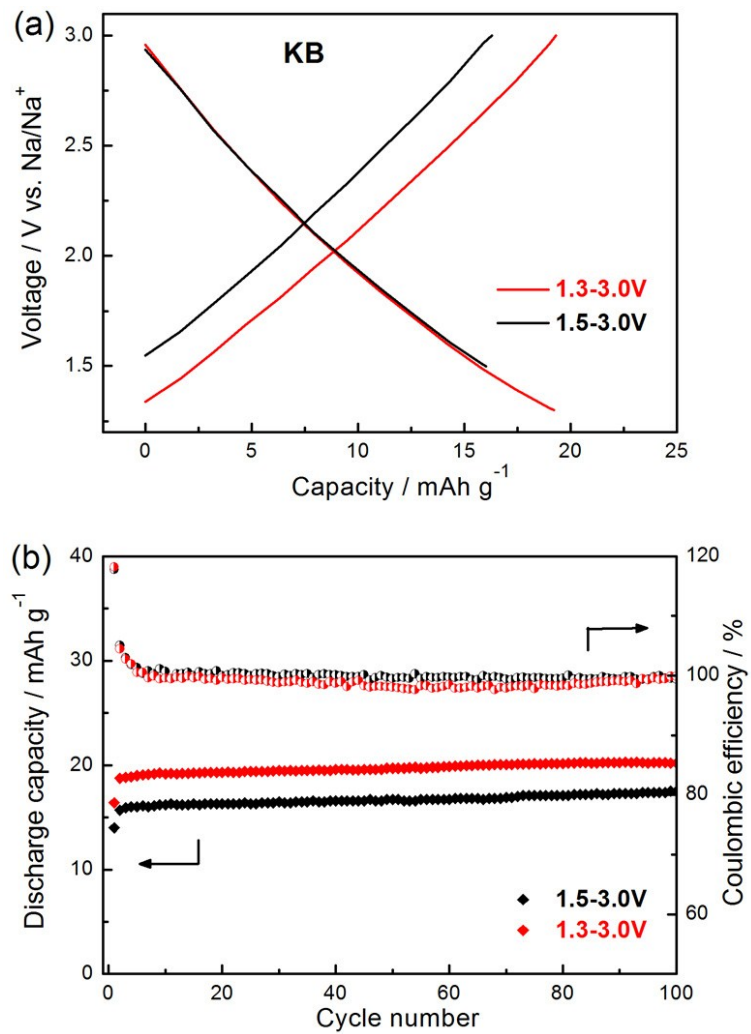

**Fig. S3** (a) Typical discharge/charge profiles (5th cycle) and (b) cycling performance of Na/KB cells with the voltage intervals of 1.5–3.0 and 1.3–3.0 V at a constant current of 50 mA g<sup>-1</sup>.

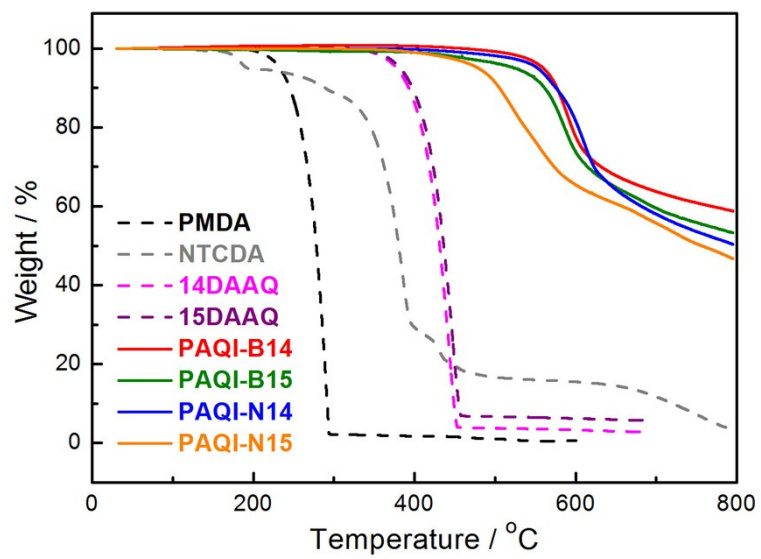

**Fig. S4** TG curves of PAQIs and the reactants.

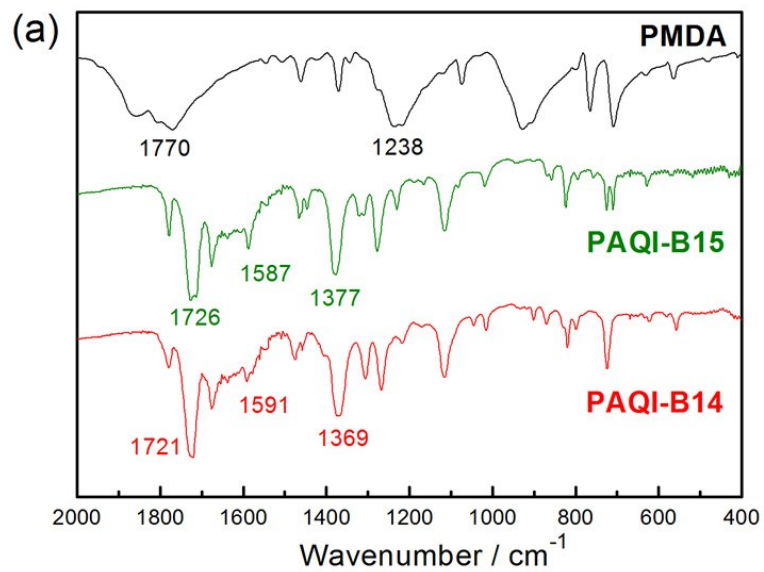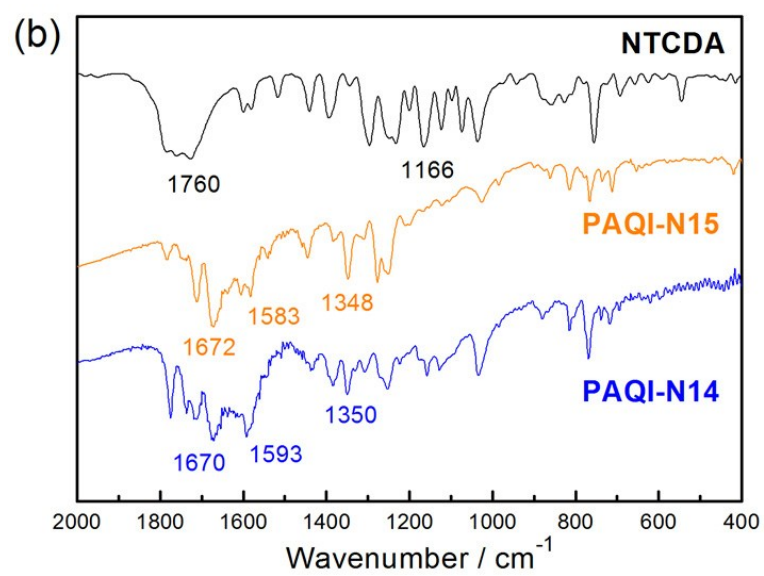

**Fig. S5** FTIR spectra of **PAQIs**, **PMDA**, and **NTCDA**.

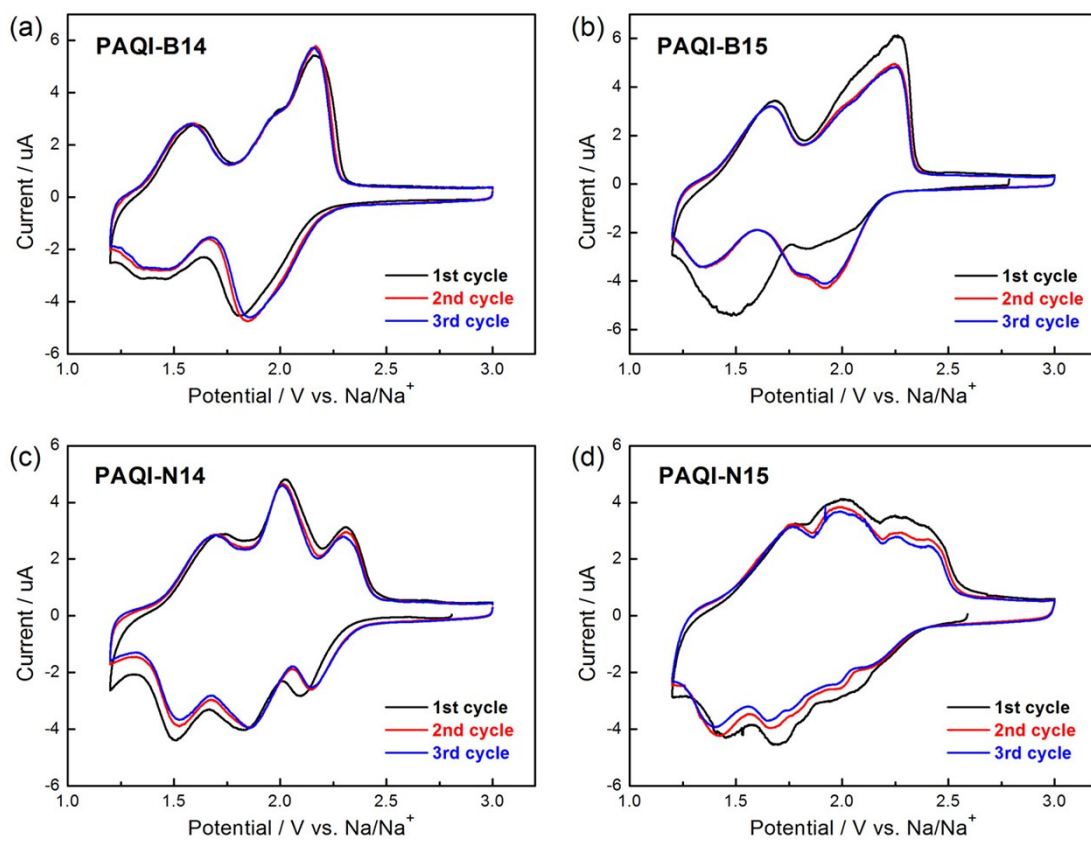

**Fig. S6** CV curves of PAQI electrodes at a scan rate of  $0.1 \text{ mV s}^{-1}$ .

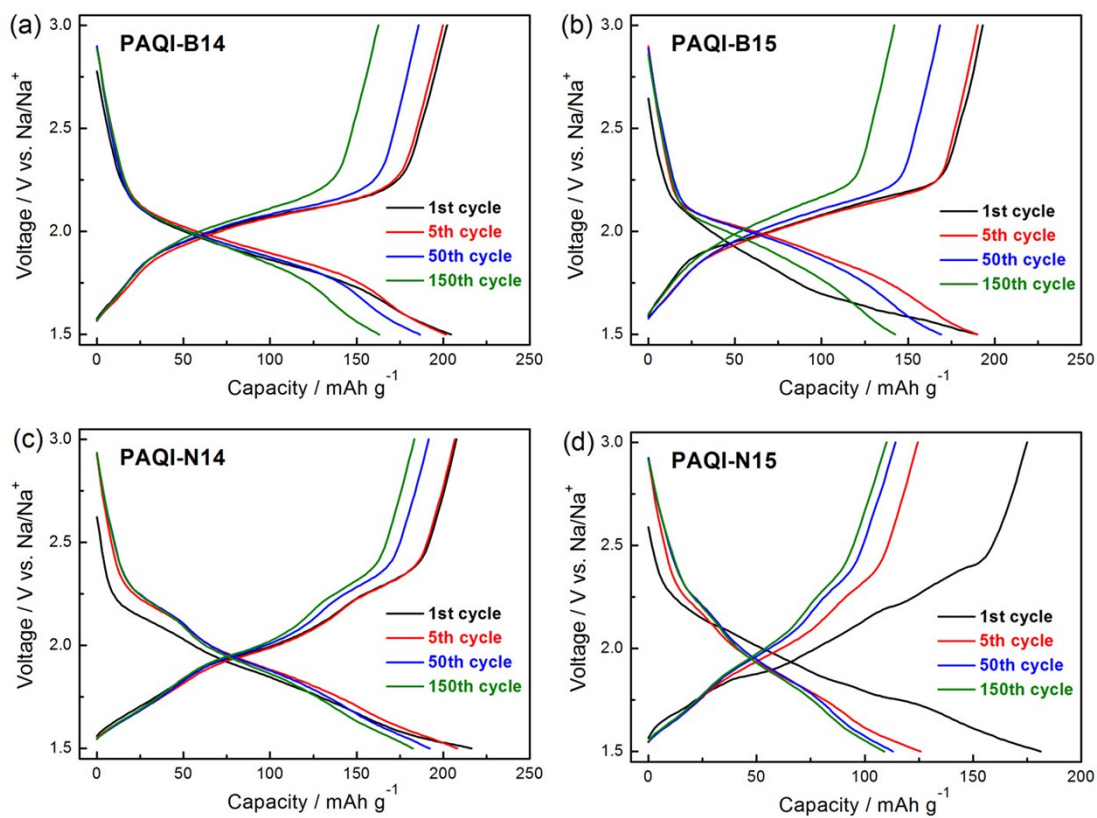

**Fig. S7** Discharge/charge profiles of Na/PAQI cells at a constant current of  $50 \text{ mA g}^{-1}$  with the voltage interval of 1.5–3.0 V.



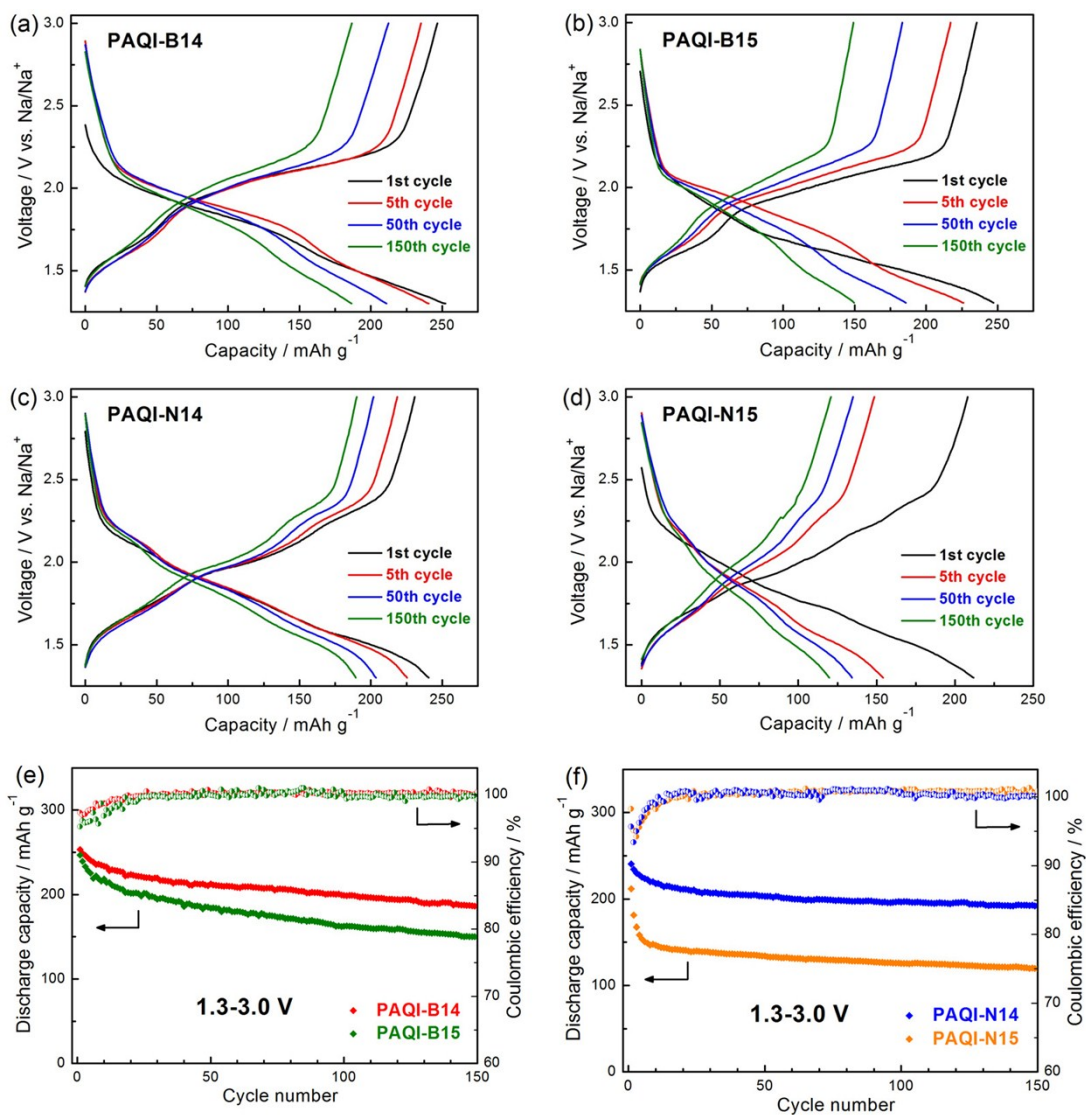

**Fig. S8** Discharge/charge profiles and cycling performance of Na/PAQI cells at a constant current of 50 mA g<sup>-1</sup> with the voltage interval of 1.3–3.0 V.
